# Supplementary material
Source: MDPI journal article supplement (https://www.mdpi.com/2073-4352/11/11/1422)
Supplement: s1 [file s1 › crystals-1429093-supplementary.pdf]

## Article

# Evaluation of ZIF-8 and ZIF-90 as heat storage materials by using water, methanol and ethanol as working fluids

Ciara Byrne <sup>1,\*</sup>, Alenka Ristić <sup>1</sup>, Suzana Mal <sup>1,2</sup>, Mojca Opresnik <sup>1</sup> and Nataša Zabukovec Logar <sup>1,3</sup>

<sup>1</sup> National Institute of Chemistry, Hajdrihova 19, SI-1000 Ljubljana, Slovenia;

<sup>2</sup> Jožef Stefan International Postgraduate School, Jamova cesta 39, SI-1000 Ljubljana, Slovenia

<sup>3</sup> School of Science, University of Nova Gorica, Vipavska cesta 13, SI-5000 Nova Gorica, Slovenia

\* Correspondence: [ciara.byrne@ki.si](mailto:ciara.byrne@ki.si)

**Keywords:** ZIF-8; ZIF-90; DSC; adsorption; TES materials;

## Supporting Information

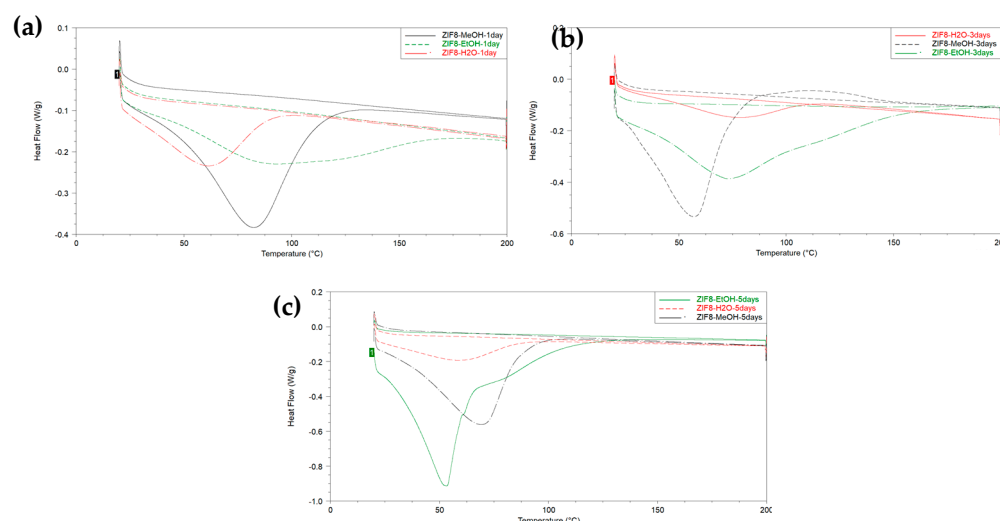

**Citation:** Byrne, C.; Ristić, A.; Mal, S.; Opresnik, M.; Logar, N.Z. Evaluation of ZIF-8 and ZIF-90 as Heat Storage Materials by using Water, Methanol and Ethanol as Working Fluids. *Crystals* **2021**, *11*, 1422. <https://doi.org/10.3390/cryst11111422>

Academic Editor: Volodymyr Bon

Received: 4 October 2021

Accepted: 18 November 2021

Published: 20 November 2021

**Publisher's Note:** MDPI stays neutral with regard to jurisdictional claims in published maps and institutional affiliations.

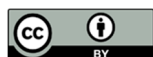

**Copyright:** © 2021 by the authors. Submitted for possible open access publication under the terms and conditions of the Creative Commons Attribution (CC BY) license (<https://creativecommons.org/licenses/by/4.0/>).

**Figure S1.** DSC for ZIF-8 after soaking in water (red), methanol (black) and ethanol (green) for (a) 1 day, (b) 3 days and (c) 5 days.

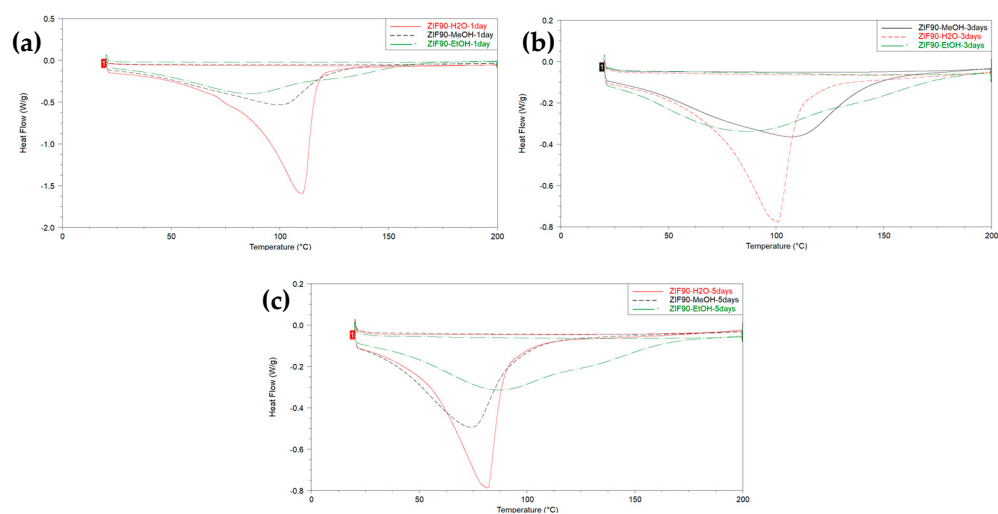

**Figure S2.** DSC for ZIF-90 after soaking in water (red), methanol (black) and ethanol (green) for (a) 1 day, (b) 3 days and (c) 5 days.

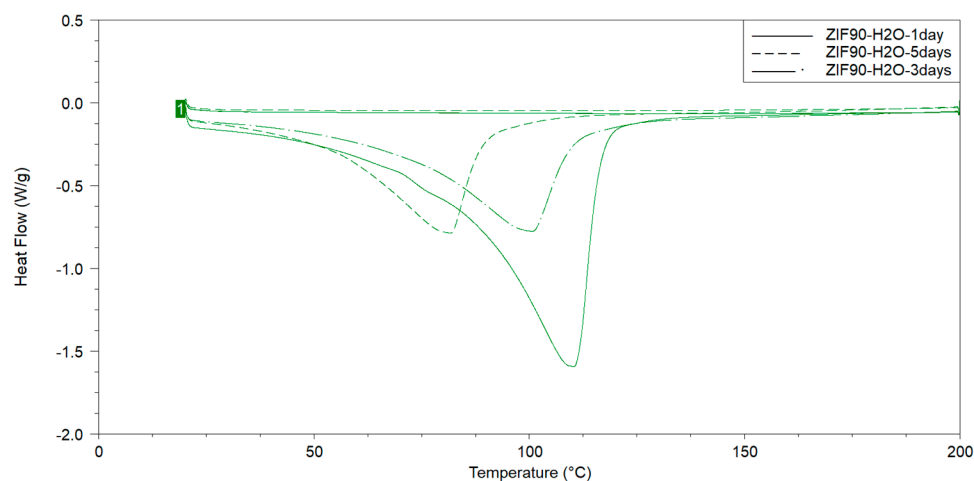

**Figure S3.** DSC for ZIF-90 after soaking in water for 1 day, 3 days and 5 days.

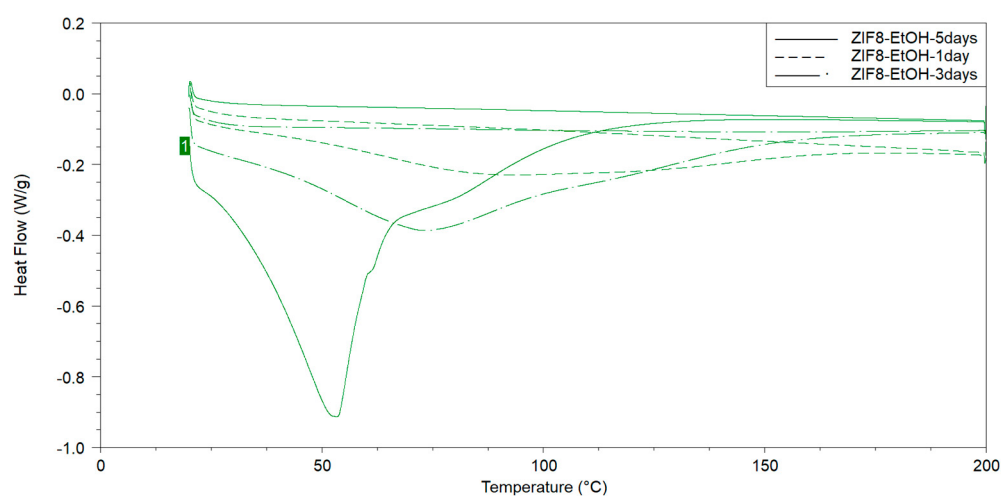

**Figure S4.** DSC for ZIF-8 after soaking in ethanol for 1 day, 3 days and 5 days.

**Table S1.** BET analysis for both ZIFs and after they had been in the 3 desiccators for 5 days, showing the specific surface area ( $S_{\text{BET}}$ ) and total pore volume ( $V_{\text{total}}$ ).

| ZIF                    | $S_{\text{BET}}$ [ $\text{m}^2/\text{g}$ ] | $V_{\text{total}}$ [ $\text{cm}^3/\text{g}$ ] |
|------------------------|--------------------------------------------|-----------------------------------------------|
| ZIF8                   | 612                                        | 0.252                                         |
| ZIF8-MeOH              | 948                                        | 0.346                                         |
| ZIF8-EtOH              | 919                                        | 0.340                                         |
| ZIF8-H <sub>2</sub> O  | 590                                        | 0.241                                         |
| ZIF90                  | 1119                                       | 0.571                                         |
| ZIF90-MeOH             | 876                                        | 0.462                                         |
| ZIF90-EtOH             | 881                                        | 0.466                                         |
| ZIF90-H <sub>2</sub> O | 780                                        | 0.418                                         |

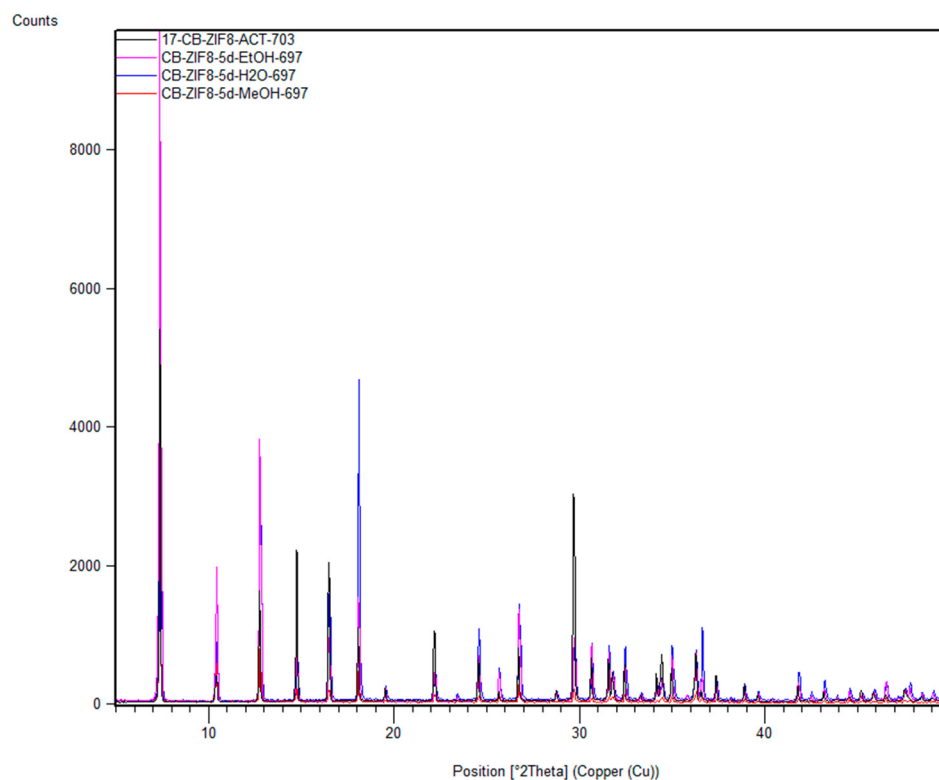**Figure S5.** PXRD patterns of ZIF-8 after activation (black) and after being in the methanol (red), ethanol (pink) and water (blue) desiccators for 5 days.

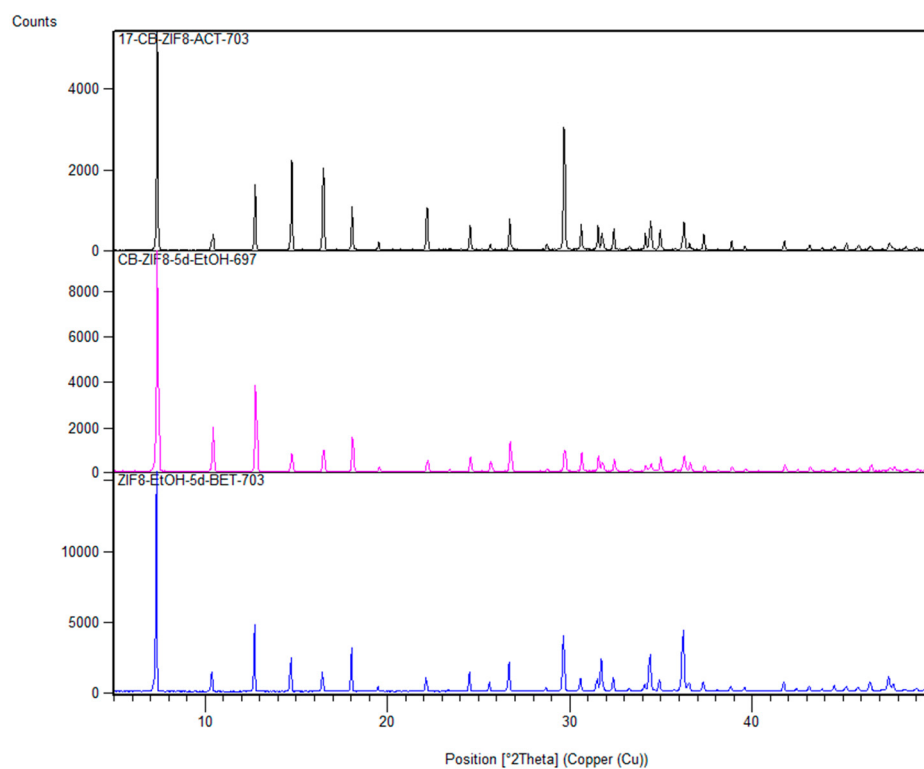

**Figure S6.** PXRD patterns of ZIF-8 after activation (black), after being in the ethanol desiccator for 5 days (pink) and after the 'soaked' sample was analysed for Nitrogen physisorption (blue).

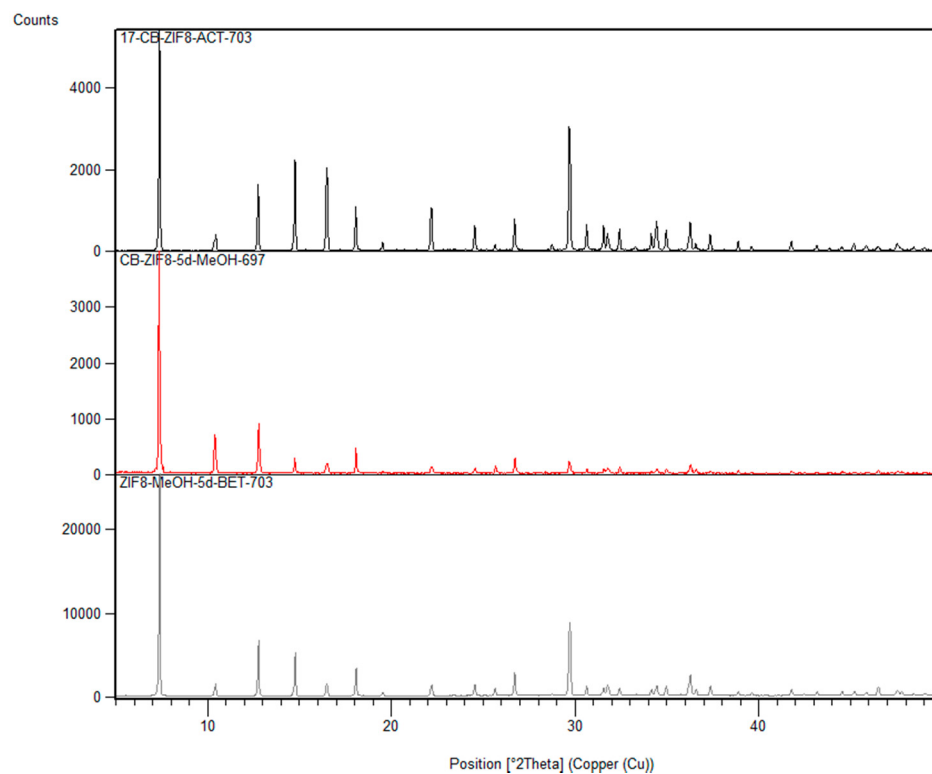

**Figure S7.** PXRD patterns of ZIF-8 after activation (black), after being in the methanol desiccator for 5 days (red) and after the 'soaked' sample was analysed for Nitrogen physisorption (grey).

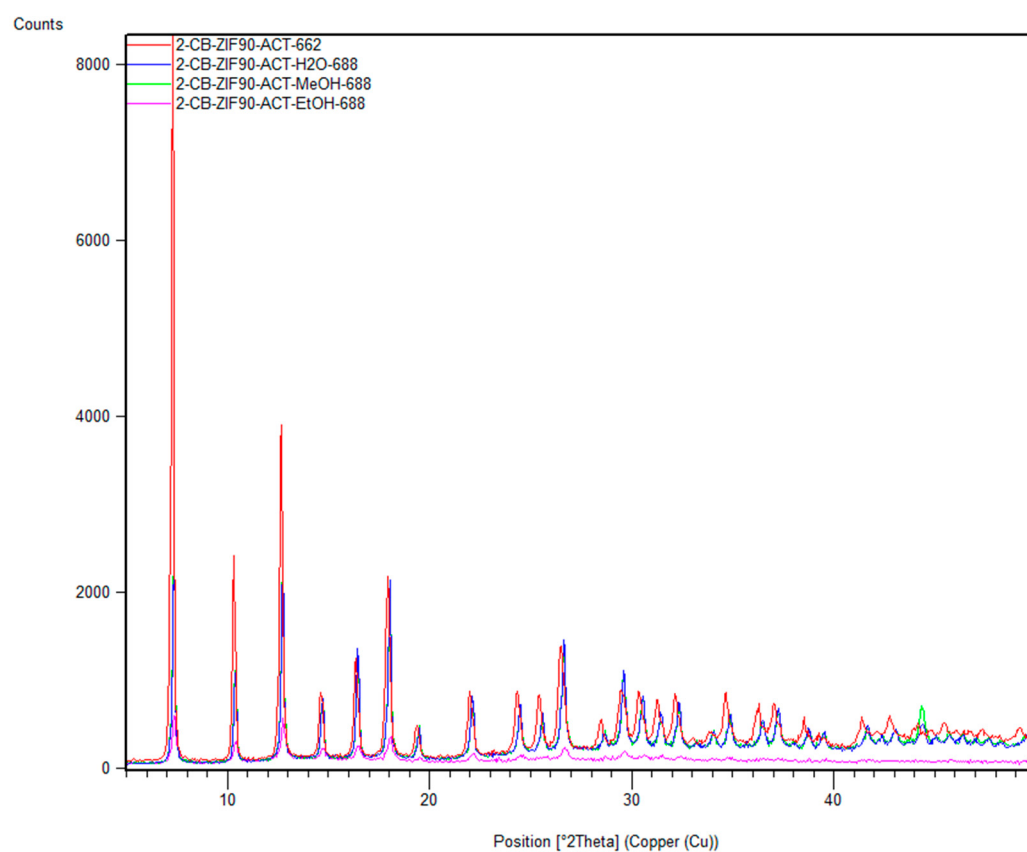

**Figure S8.** PXRD patterns of ZIF-8 after activation (red) and after being in the methanol (green), ethanol (pink) and water (blue) desiccators for 5 days.
